# Supplementary material for: Exploring Weak Ligand–Protein Interactions by Long-Lived NMR States: Improved Contrast in Fragment-Based Drug Screening
Source: PubMed Central journal article supplement (PMC4497601; doi:10.1002/anie.201404921), 2014-09-04
Supplement: anie0053-11376-sd1.pdf [file anie0053-11376-sd1.pdf]

Supporting Information

© Wiley-VCH 2014

69451 Weinheim, Germany

**Exploring Weak Ligand–Protein Interactions by Long-Lived NMR States: Improved Contrast in Fragment-Based Drug Screening\*\***

*Roberto Buratto,\* Daniele Mammoli, Elisabetta Chiarparin, Glyn Williams, and Geoffrey Bodenhausen*

anie\_201404921\_sm\_miscellaneous\_information.pdf

## Contents

|                                          |   |
|------------------------------------------|---|
| 1. Sample preparation.....               | 2 |
| 2. Experimental procedures .....         | 2 |
| 3. LLS titration of a spy molecule ..... | 3 |
| 4. Fitting procedure .....               | 3 |

## 1. Sample preparation

All solutions for screening and titration experiments were prepared in 20 mM TRIS buffer with 150 mM NaCl, 5 mM MgCl<sub>2</sub>, and 1 mM TCEP. Stock solutions were prepared in d6-DMSO containing 150 mM vanillic acid diethylamide (Sigma-Aldrich, purity >98%), 150 mM 2-amino-4-chloro-pyrimidine (Fluorochem, purity > 97%), 150 mM 2-aminopyrimidine (Acros, purity 98%), 400 mM 3-hydroxyindazole, 400 mM 7-methyl-3,4-dihydrothieno[3,2-d]pyrimidine-4-one and 400 mM 3-bromo-5-methyl-pyridine-2-ylamine from Astex' fragment library. For ADP (Sigma-Aldrich, as sodium salt hydrate from bacterial source, purity > 95 %), a 150 mM stock solution was prepared in 20 mM TRIS buffer with 150 mM NaCl, 5 mM MgCl<sub>2</sub>, and 1 mM TCEP. A hexahistidine-tagged N-terminal fragment (9-224) of HSP90 $\alpha$  was cloned into a pET28 vector and expressed in E.Coli BL21 (DE3). The expressed protein was retained on a Ni<sup>2+</sup> affinity column, followed by cleavage of the His tag using thrombin and purification on a Superdex75 gel filtration column. The final buffer used contained 20 mM TRIS-HCl, pH7.4, 150 mM NaCl with 1 mM  $\beta$ -ME.

## 2. Experimental procedures

The direct titration of ADP (ligand I) against Hsp90 was performed by adding 2-5  $\mu$ L aliquots of ADP stock solution to 400  $\mu$ L of a 10  $\mu$ M solution of Hsp90. Titrations of ligands II and IV were carried out with the same procedure. Competition titrations were performed by addition of 2-5  $\mu$ L aliquots of the stock solution of ligand II, on the one hand, to 400  $\mu$ L of a 10  $\mu$ M solution of Hsp90 with 15  $\mu$ M ADP, and, on the other hand, to 400  $\mu$ L of a 10  $\mu$ M solution of Hsp90 containing 100  $\mu$ M of ligand IV. The same procedure was followed to determine the  $K_D$  of the ligands V, VI and VII: the first one was performed in the presence of [ligand V] = 1 mM, the second one in the presence of [ligand VI] = 1 mM and the last one in the presence of [ligand VII] = 2.92 mM. All NMR measurements were performed on a 500 MHz (11.74 T) spectrometer equipped with a cryoprobe at 25°C. The experiments were performed with the following pulse sequence for the excitation, sustaining and observation of long-lived states (LLS) [1]:

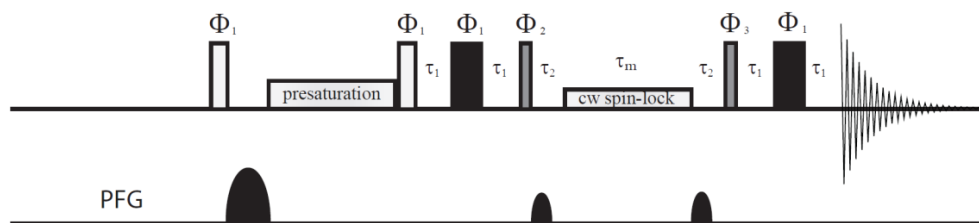

**Figure 1** Pulse sequence to determine relaxation rates  $R_{LLS}$  of long-lived states (LLS).

where pulses with flip angles of  $\pi/2$ ,  $\pi/4$  ( $45^\circ$ ) and  $\pi$  are indicated by white, grey and black rectangles, respectively. For a system comprising two non-equivalent spins  $I = 1/2$  and  $S = 1/2$  with a chemical shift difference  $\Delta\nu_{IS} = (\Omega_I - \Omega_S)/2\pi$  and a scalar coupling constant  $J_{IS}$ , the intervals  $\tau_1$  and  $\tau_2$  must be set to:

$$\tau_1 = (4J_{IS})^{-1} \quad (1)$$

$$\tau_2 = (2\Delta\nu_{IS})^{-1} \quad (2)$$

At the beginning of the experiment, a  $\pi/2$  pulse followed by a pulsed field gradient along the z axis were applied to suppress the magnetization. A weak water presaturation pulse lasting 3 s was applied in the subsequent recovery delay. During the sustaining delay  $1.2 \text{ s} < \tau_m < 3.5 \text{ s}$  (chosen depending on the expected the constant  $T_{LLS} = 1/R_{LLS}$ ), continuous-wave radio-frequency (rf) irradiation was applied, with the carrier set half-way between the two chemical

shifts,  $\Omega_{carrier} = (\Omega_1 + \Omega_2)/2$ , in order to make the spins magnetically equivalent in the sense of average Hamiltonian theory. Two pulse field gradients were applied during the two  $\tau_2$  delays in order to dephase double quantum coherences. The acquisition time was 2.2 s. The phase cycle was  $\Phi_1 = (x, -x)$ ,  $\Phi_2 = (y, y, -y, -y)$ ,  $\Phi_3 = (y)$  and  $\Phi_{receiver} = (x, -x, -x, x)$ . The number of scans was chosen according to the concentration. For example, during screening experiments with 500  $\mu\text{M}$  of spy ligand, 64 scans were accumulated, thus requiring 10 minutes per sample. The rates  $R_{LLS}$  were obtained from the ratio of the signal intensities observed using two different sustaining delays  $\tau_a$  and  $\tau_b$ , repeating each of them twice in order to compare four pairs of signal intensities  $I_a(\tau_a) - I_b(\tau_a)$ :

$$R_{LLS} = \frac{\log \frac{I_a}{I_b}}{(\tau_b - \tau_a)} \quad (3)$$

Typically, we used  $\tau_a = 0.5$  s and  $\tau_b$  in the vicinity of the estimated value of  $T_{LLS} = 1/R_{LLS}$ .

### 3. LLS titration of a spy molecule

The LLS titration of the spy molecule without competitor was carried out by addition of aliquots of a stock solution of 150 mM vanillic acid diethylamide in DMSO to 400  $\mu\text{L}$  of a 10  $\mu\text{M}$  solution of Hsp90 protein in the buffer described above. The contrast  $C_{LLS}$  was determined after sustaining the LLS for  $\tau_a = 0.5$  s and  $1.0 < \tau_b < 2.5$  s.

| Vol added / $\mu\text{L}$ | [protein] / $\mu\text{M}$ | $[\text{L}]_{tot}/[\text{P}]_{tot}$ | $X^{bound}$ | Contrast $C_{LLS}$ / % |
|---------------------------|---------------------------|-------------------------------------|-------------|------------------------|
| 1.50                      | 10.00                     | 56                                  | 0.74        | 72                     |
| 3.30                      | 9.96                      | 125                                 | 0.49        | 63                     |
| 5.40                      | 9.90                      | 202                                 | 0.36        | 54                     |
| 7.20                      | 9.86                      | 272                                 | 0.28        | 45                     |
| 9.70                      | 9.80                      | 366                                 | 0.22        | 41                     |
| 14.50                     | 9.69                      | 548                                 | 0.16        | 29                     |
| 18.80                     | 9.59                      | 707                                 | 0.13        | 23                     |

### 4. Fitting procedure

The relaxation rates  $R_{LLS}^{obs}$  measured during the titrations were fitted to the following equation:

$$R_{LLS}^{obs} = \frac{[PL]}{[L_{tot}]} R_{LLS}^{bound} - \left(1 - \frac{[PL]}{[L_{tot}]}\right) R_{LLS}^{free} \quad (4)$$

$$\text{where } \frac{[PL]}{[L_{tot}]} = X_{bound} = \frac{[P_{tot}] + [L_{tot}] + K_D - \sqrt{([P_{tot}] + [L_{tot}] + K_D)^2 - 4[P_{tot}][L_{tot}]}}{2[L_{tot}]} \quad (5)$$

By fitting the relaxation rates  $R_{LLS}^{obs}$  to equation 5, one can determine the dissociation constant  $K_D$ . One should perform two kinds of titration experiments:

Direct titration. If the spy ligand that carries the LLS is titrated against the protein in the absence of any competitors, one obtains  $K_D = K_{D, true}^{spy}$ , i.e., is the true value of the dissociation constant of the spy ligand.

Competition titration. If the spy molecule is titrated against the protein in the presence of a competitor, one initially obtains  $K_D = K_{D, app}^{spy}$  the apparent dissociation constant of the spy ligand. Note that  $K_{D, app}^{spy} > K_{D, true}^{spy}$ . The latter can be extracted by LLS titration without competitor, or by using non-NMR methods such as ITC.

One may calculate the dissociation constant  $K_D^{comp}$  of the competitor with the following relationship [2]:

$$K_D^{comp} = \frac{[L^{comp}]K_{D, true}^{spy}}{K_{D, app}^{spy} - K_{D, true}^{spy}} \quad (6)$$

where  $K_D^{comp}$  is the dissociation constant of the competitor and  $[L^{comp}]$  is the concentration of the competitor.

The errors (root-mean-square deviations) were estimated from the four pairs of signal intensities obtained using two different sustaining delays  $\tau_a$  and  $\tau_b$  and repeating each experiment twice.

[1] R. Sarkar, P. R. Vasos, G. Bodenhausen, *J Am Chem Soc* **2007**, *129*, 328-334.

[2] C. Dalvit, M. Flocco, S. Knapp, M. Mostardini, R. Perego, B. J. Stockman, M. Veronesi, M. Varasi, *J Am Chem Soc* **2002**, *124*, 7702-7709.
